# Supplementary material
Source: publisher figshare collection journal article supplement (https://sage.figshare.com/ndownloader/files/18018227)
Supplement: Supplementary file 1 [file 18018227]

**Video S1:** In the 1<sup>st</sup> week of life, newborn chicks were reared with an animation showing four sequentially-presented shapes (the imprinting sequence). The order of the shapes was defined by the transitional probabilities (TPs) between shapes.

**Video S2:** A demonstration of a Transitional Probability (TP) test trial. On the TP test trials, one display wall showed the imprinting sequence, while the other display wall showed a sequence with familiar shapes defined by a different statistical structure.

**Video S3:** A demonstration of a Shape Recognition test trial. On the Shape Recognition test trials, one display wall showed a sequence of familiar shapes, while the other display wall showed a sequence of novel shapes.
